# Supplementary material
Source: publisher figshare collection journal article supplement (https://plos.figshare.com/articles/dataset/_/122281)
Supplement: Supplementary file [file 1]

**A- P1**

Cttt**gtccc**ttttgtcgattggagaccaaggactaactgtgctggtgaatattgcctttaaagcaaagcctggactttgccctctg**ccatt**tcaggtt  
tcatttctcagaaaggctttttgt**ggaggag**aaagaaggcgctccgaggtaccctaccggtgccaccctgg**tcgccc**gcgcgcttctc  
cccagatctgtattttctgctgggataaacctgaactcgtcccagcctcgttctcttttaaaggtaagacagagtgacccggagcgttgggggtg  
ctgcagcctgggagttcctggcctccaggcgcctccccctccaccggttcactgagcaccaggactgcctggtttccgtatggaaggcgcc  
ggctttgaggagacgctattgtctc**ctccaagg**cggcagccccg**ctccaag**cgcacgcctcacggctccctgtccgt**gtccc**cgctct**gtc**  
**cc**cgcg**ccgccc**ctacaattcacacgcagcagcgcacacacatacacacacacacacacacacacacacacacacacacacacacacacatttcgctgtta  
tttgccac**ggaggag**gataacgaaggagcAATTAAGCGTTCAAAGCCTCGCTAGACAGCACACCGCCGCAGCCT  
TCGCAAATCTGG...3'

**B- P2**

cgggaattcgcagcgtcggctcaccatcttcgctcgcgcgccttccatcccacccgacgagctggcgctgccccgcctcactttccatcctgc  
aggcgcccggcgccctccgtaaatcaagctcctccccctccccctccccctccccctcttttttttttttttggctgtaattggggcctctgtcgga  
acgccaactgcctttccttaactacctcagcttcatcc**ccatt**ccacctccctaaagggaaaaggcaggttccgctccagaggtctcatctcttcc  
**ccgccc**ctcag**tcgccc**acaggatcccccaattgcag**cccatt**ctctctgtagcctgactccggaggcggaggactcagggccgcggggtgcct  
cgcagaaggcgtcccccgacgtgggaggcagtttggctcccctccctgccccttagcttaaatcgctctgtcttccctcccaccctcgcacccatcgc  
cctttctccccgtctccctcct**ct**taagtccccccccccggctc**ctccc**gcctgccccg**cccgc**ccctgtctgccccgacccctcgccctcgcctctct  
ctctgtctcctgttctctgc**CCCCTCTGCC**CCCTCTGGCTTCGCTCGCTCGCTGCACG**CCGCC**CTCGCTCACTC  
TCTGTCTGTGCGCTGTGCTCTATCTTTCTCACTGACTGTCTTCTGCTACTTCTGTCCACTGTTCTACAA  
AACCCCTCTT**CACT**ATCTCCCCAACTTATCCAAAAACAACGAGTCA**ACCCGCC**CCCGCCCCAAAGCCC  
GTCCACTTGAATAAAAAAAAAAAAA**AGACA**AAAAAACCTAACTACGCCCCCA**TATAAAG**CCAGAA  
CCAGCCTGACCCGAATCCAAA**ATTAGACC**AATGATGAGATTTCTGTAGCGCGGGAACACGGCAAGA  
GGAGTCGCTTCAGGGTCGGCGGACGCGAGTGTGAGCACCCCTACAACAGTCCCGCAGCAAGGAGGT  
GGGCAGTAGCAGTGGCAGCTTTGA...3'

**C- P3**

aacctgaattgaaggagggtctgttgcctgtaactttataaaatccctcagctcccccaaggatgctactcattggcataggaaaaccaaggcca  
gaacagctaagccaaatgttggggggaggaaggggcagccacattactcttggggatgccggtagacagtgccaatatctgaaagagttcatga  
aatctgtgtggtatctctggtaggggaaagttttgcccaggaatctgacaggatagggaagggtgccttataggctgagtcctagttgttagtta  
ggat**ccatt**aggcagcacagaccagatggggcagggttatactgatcttggatccctgaagccgtgggtctctgggctagggtgtaggggggtgt  
gccactttggcaaatccttggaggaccaggtaatggtgatgaatctgggaattgttccagagtgccctcttagggaccctgatatcattggctgagctga  
aggatgggggattgggtgagctgaagaagtaggagggagattggggagggacaagcagggcggtgtatggactgggttggactttgggggctg  
ggggctac**ataatg**tgtagcacagatcagctct**tcAGTTT**CGGAGATCACTGAGAGCGGAGC**AGTCA**CCCTCCAAG  
CCTTCTGCTGGGCACTGGTGGAGAGACAGAAGACAGCCTCACTCTTGAAAAGCTCAG...3'

**Figure S1 Nucleotide sequence of the three tammar *IGF2* gene promoters.** The DNA sequences of *IGF2* promoters P1, P2 and P3 are illustrated in A, B, and C, respectively. Transcription start sites (TSSs) identified by 5'RACE are indicated by the arrows. ggaggag repeats are in boxes, CTCCCAAG repeats are highlighted in yellow and TGTCCC repeats are highlighted in green. TATA-boxs (TATAWAAR) are emboldened and red, CCATT and GC-box/Sp1-sites are underlined, Inr elements (YYANWYY) are emboldened and blue and DPE (RGWYV) sequences are emboldened and green. Exon sequences are in capitals. P1 is characterised by multiple repeat sequences. P2 has multiple TSSs and a high number of CCATT and GC-box/Sp1-sites. A TATA-Inr core promoter was identified around the fourth TSS. P3 is an Inr-DPE core promoter. Degenerate nucleotides represented using IUPAC codes.
