# Supplementary material
Source: publisher figshare collection journal article supplement (https://plos.figshare.com/articles/dataset/_/122281)
Supplement: Supplementary file [file 1]

**Supplementary Table S1.** Primers used in this study.

| Experiment/Gene               | Primer                    | Primer sequence (5' to 3')   |
|-------------------------------|---------------------------|------------------------------|
| 5'RACE                        | GSP1-s275                 | GCAGGGGTAGCACAGTAGGTCTC      |
|                               | GSP2-s117                 | GTCTACCAGTTCCCCACCACAAAG     |
|                               | GSP2-s 50                 | GCCAAAAAGGTGAGTGATAACAGGA    |
| <i>Imprint and expression</i> | gDNAFw                    | GACTCCACTTTCCTTCCTTCCCTTT    |
|                               | cDNA-1A-Fw                | CTTCGCAAAATCTGGATGGGTTT      |
|                               | cDNA-1B-Fw                | AGTGGCAGCTTTGAATGGGTTT       |
|                               | cDNA-1C-Fw                | CTCACTCTTGAAAAAGCTCACGAT     |
|                               | Seq Fw                    | GAGAGGGCCTCGCTACCAAC         |
|                               | SNP1-Rv                   | AAAGCATGGCAGCCCACACT         |
|                               | SNP1-3Rv                  | CTCTTCTGCCGAAGGATGAC         |
|                               | qPCR-Rv                   | TGCCAGGAAGACTGAAATAGAAGC     |
|                               | gDNA-CGI4-Fw              | GTGGCCAAGAGCCAGGCAAG         |
|                               | gDNA-CGI4-Rv              | AGGGCGAGGACAGACTGGAAG        |
| <i>Bisphite sequencing</i>    | P1-BS- Fw                 | GGGAGTTTTTTGGTTTTTTTAGGT     |
|                               | P1-BS- Rv                 | AAAAAAAAACATACCCCAAATTTTAC   |
|                               | P2-BS1- Fw                | TTTTTGTTTATTGTTTTATAAAATTTTT |
|                               | P2-BS1- Rv                | CACTACTACTACCCACCTCCTTACTAC  |
|                               | P2-BS2- Fw                | TTTAAAATTAGATTAATGATGAGATTT  |
|                               | P2-BS2- Rv                | CTACTACTACCCACCTCCTTACTAC    |
|                               | P3-BS- Fw                 | TGGGGTAGGGTTATATTGATTTTTGGAT |
|                               | P3-BS- Rv                 | TCTATCTCTCCACCAATACCCAACAAA  |
|                               | CGI4-BS -Fw               | AGTGAGGGAGAAGAGGGTTTTATTA    |
| CGI4-BS -Rv                   | AACCTCTTACCTCCCAAATTAACTC |                              |
| <i>B-ACTIN</i>                | Fw                        | TTGCTGACAGGATGCAGAAG         |
|                               | Rv                        | AAAGCCATGCCAATCTCATC         |
| <i>18S</i>                    | Fw                        | CGGCTACCACATCCAAGGAA         |
|                               | Rv                        | GCTGGAATTACCGCGGCT           |
| <i>GAPDH</i>                  | qPCR Fw                   | TCCCAATGTATCTGTTGTGGATCTG    |
|                               | qPCR Rv                   | AACCATACTCATTGTCATACCAAGAAAT |
|                               | Fw                        | CCTACTCCCAATGTATCTGTTGTGG    |
|                               | Rv                        | GGTGGAACCTCTTTTTTACTGG       |
