# Supplementary material
Source: publisher figshare collection journal article supplement (https://plos.figshare.com/articles/dataset/_/122281)
Supplement: Supplementary file [file 1]

```

opossum 1079 AGAGGAGTCACTTCTGGGTCGCGGACGCGCGGTGGCACCCCTCAACAGTCCCGCAGC
tammar 1044 AGAGGAGTGGCTTCAGGGTCGCGGACGCGAGTGTGAGCACCTCAACAGTCCCGCAGC
consensus 1201 ***** ** * ** * ** * ** * ** * ** * ** * ** * ** * ** * ** * ** * ** * ** * ** *
opossum 1139 AAGGAGGTGGGCAGCAGCAGGAGCAGCTCCGAG
tammar 1104 AAGGAGGTGGGCAGTAGCAGTGCAGCTTTGA-
consensus 1261 ***** ** * ** * ** * ** * ** * ** * ** * ** * ** * ** * ** * ** * ** * ** * ** *

```

**Supplementary Figure S2. Alignment of tammar exon 1B region with opossum exon 1 region.** Opossum non-coding exon = 1-420 Tammar exon 1B = 725-1104. Alignments were performed using ClustalW and were highlighted using BOXshade 3.31.
